# Supplementary material for: A new target region for changing the substrate specificity of amine transaminases
Source: PubMed Central journal article supplement (PMC5377235; doi:10.1038/srep10753), 2015-06-01
Supplement: srep10753-s1.pdf [file srep10753-s1.pdf]

# Supplementary Materials for

## A new target region for changing the substrate specificity of amine transaminases

Li-Jun Guan<sup>1,+</sup>, Jun Ohtsuka<sup>1,+</sup>, Masahiko Okai<sup>1,2</sup>, Takuya Miyakawa<sup>1</sup>, Tomoko Mase<sup>1</sup>, Yuehua Zhi<sup>1</sup>, Feng Hou<sup>1</sup>, Noriyuki Ito<sup>3</sup>, Akira Iwasaki<sup>4</sup>, Yoshihiko Yasohara<sup>3</sup>, Masaru Tanokura<sup>1,\*</sup>

<sup>1</sup>Department of Applied Biological Chemistry, Graduate School of Agricultural and Life Sciences, The University of Tokyo, 1-1-1 Yayoi, Bunkyo, Tokyo 113-8657, Japan

<sup>2</sup>Department of Ocean Sciences, Tokyo University of Marine Science and Technology, 4-5-7, Konan, Minato-ku, Tokyo 108-8477, Japan

<sup>3</sup>Frontier Biochemical & Medical Research Laboratories, Kaneka Corporation, 1-8, Miyamae, Takasago, Hyogo 676-8688, Japan

<sup>4</sup>Research & Development Group, QOL Division, Kaneka Corporation, 1-8 Miyamae, Takasago, Hyogo 676-8688, Japan

<sup>5</sup>These authors contributed equally to this work.

\*Corresponding author. E-mail: [amtanok@mail.ecc.u-tokyo.ac.jp](mailto:amtanok@mail.ecc.u-tokyo.ac.jp), Tel: 03-5841-5165, Fax: 03-5841-8023

**This PDF file includes:**

**Supplementary Figures 1-10**

**Supplementary Tables 1-2**

1

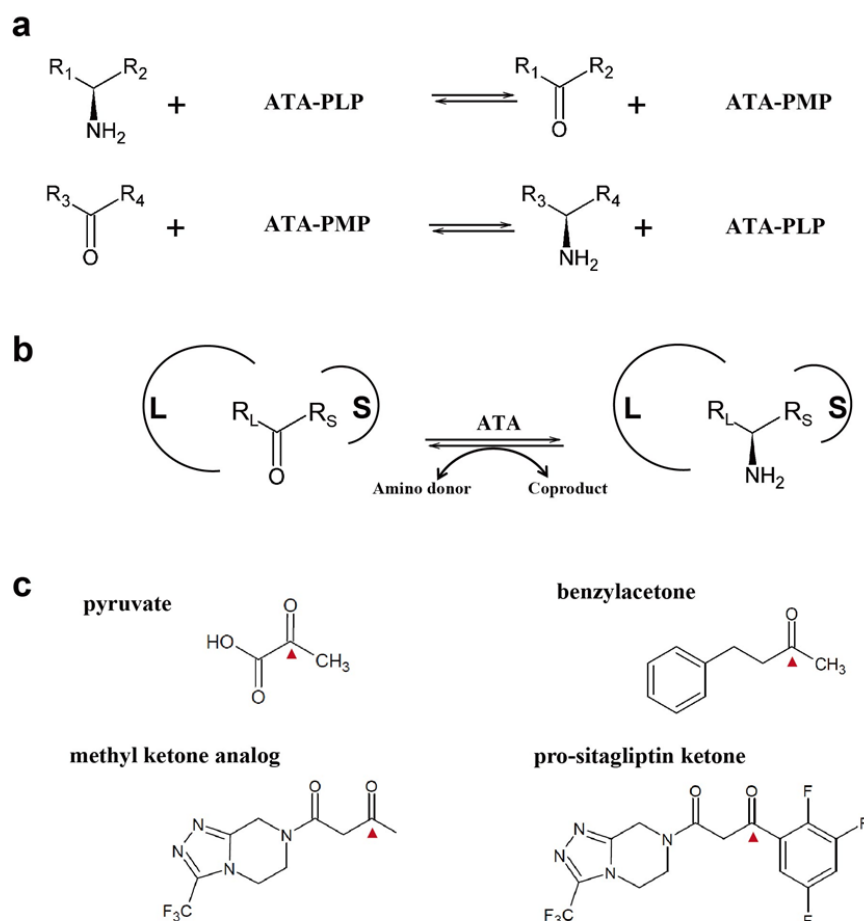

2

3 **Supplementary Figure 1. The reaction system of amine transaminases (ATAs).** (a) Two  
4 half reactions comprising the transaminase reaction. (b) Two binding-site model with a  
5 large-binding pocket (L) and a small-binding pocket (S).  $R_S$  and  $R_L$  represent the small  
6 sized alkyl group and large sized alkyl/aryl group, respectively. (c) The structures of the  
7 organic compounds pyruvate, benzylacetone, methyl ketone analog and pro-sitagliptin  
8 ketone used in the reaction system of Ab-R-ATA or ATA-117-Rd11. The red arrow heads  
9 represent the reactive carbonyl group.

2

1

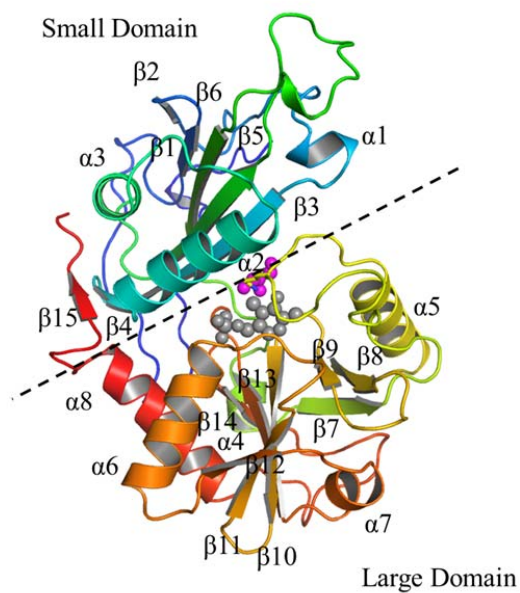

2

3 **Supplementary Figure 2. Overall structure of Ab-R-ATA.** The Ab-R-ATA protomer is  
4 colored in a rainbow representation from the N-terminus in blue to the C-terminus in red.  
5 Secondary structure elements are labeled. PLP (grey) and glycerol (magenta) between the  
6 large domain and small domain are shown as spheres. The glycerol molecule came from the  
7 protein solution.

8

1

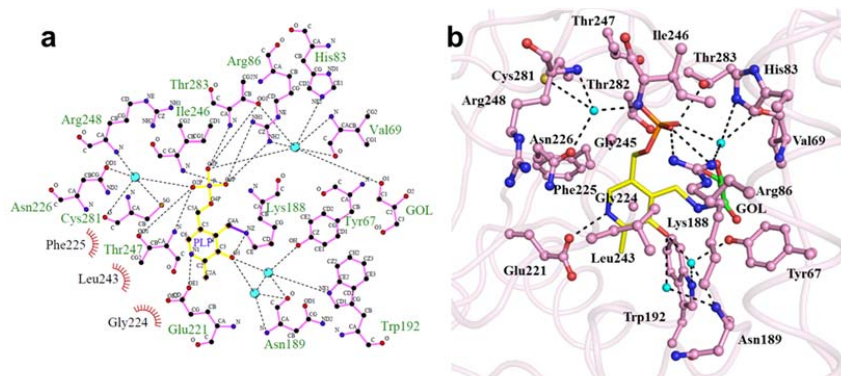

2

3 **Supplementary Figure 3. Detailed structural representation of the interactions**

4 **between PLP and Ab-R-ATA. (a)** LIGPLOT representation of the PLP and Ab-R-ATA.

5 Hydrophilic interacting atoms are connected by black dashed lines; nonligand residues

6 involved in direct hydrophobic contacts with PLP are shown as red semicircles with

7 radiating spokes. The Schiff base between the PLP and Lys188 residue of Ab-R-ATA are

8 shown in purple. Water molecules are shown as cyan circles. **(b)** Three-dimensional residue

9 interaction map illustrating the amino acids within 4 Å from PLP. PLP is shown as yellow

10 sticks. Residues within the binding pocket are shown as a ball-and-stick representation in

11 pink.

12

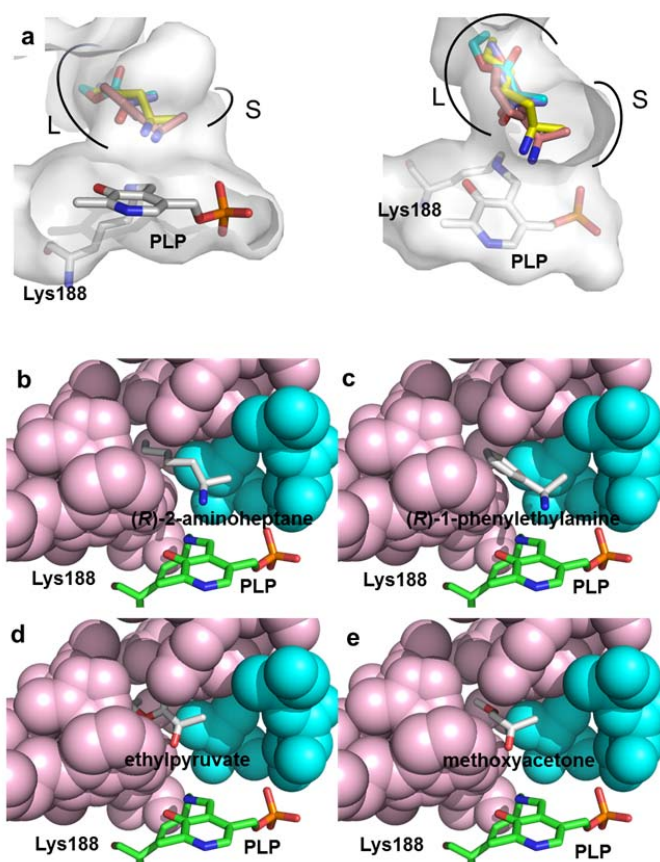

1

2 **Supplementary Figure 4. The large binding pocket and small binding pocket of**  
 3 **Ab-R-ATA. (a)** The active site cavity (white surface) and the docking models of Ab-R-ATA  
 4 and (*R*)-2-aminoheptane (yellow), (*R*)-1-phenylethylamine (orange), ethylpyruvate (cyan)  
 5 and methoxyacetone (magenta). The internal aldimine formed by PLP and Lys188 is shown  
 6 as white sticks. **(b)**, **(c)**, **(d)**, and **(e)** are close-up views of the binding sites of the docking  
 7 model for (*R*)-2-aminoheptane, (*R*)-1-phenylethylamine, ethylpyruvate and methoxyacetone,  
 8 respectively. The large binding pockets and small binding pockets are shown as pink  
 9 spheres and cyan spheres, respectively. The four ligands are shown as white sticks while the  
 10 internal aldimine composed of PLP and Lys188 is shown as green sticks.

1

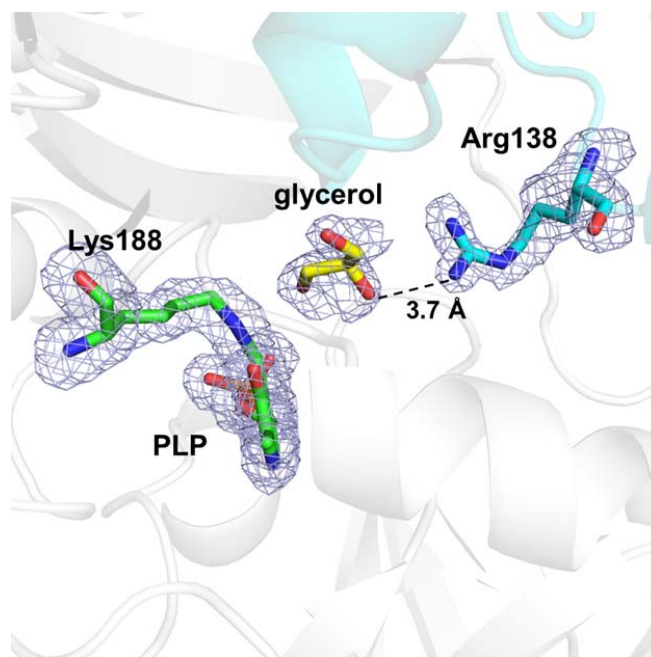

2

3 **Supplementary Figure 5. View of the glycerol molecule between the two protomers of**  
4 **Ab-R-ATA.** The internal aldimine formed by Lys188 and PLP, the glycerol molecule and  
5 the residue Arg138 from the adjacent protomer are shown as green, yellow and cyan sticks,  
6 respectively. The electrostatic interaction between glycerol and Arg138 is shown by a black  
7 dashed line. The  $F_o-F_c$  omit map for the internal aldimine, glycerol and Arg138, contoured  
8 at  $2.5 \sigma$ , is shown as light blue mesh.

9

1

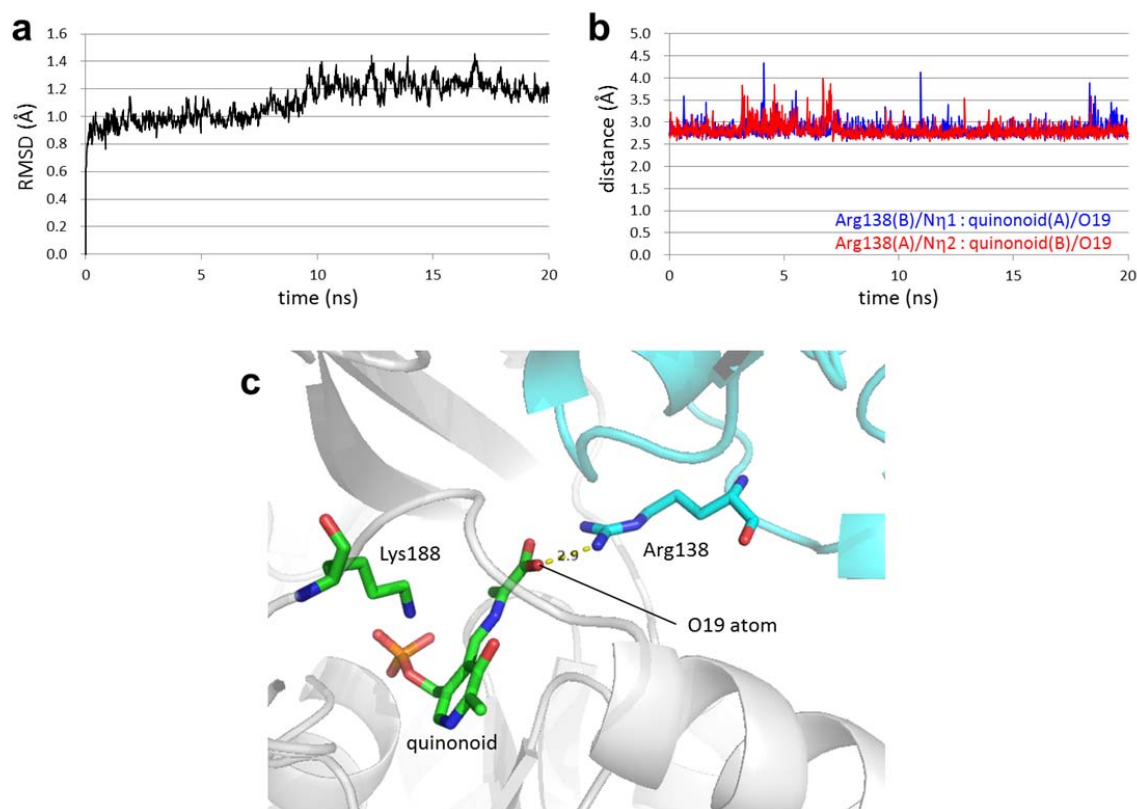

2

3 **Supplementary Figure 6 Molecular dynamics simulation of Ab-R-ATA complexed with**

4 **PMP-pyruvate quinonoid intermediate.** (a) The RMS deviations of C $\alpha$  atoms. The

5 overall structure of the complex is stable after 0.2 ns. (b) Interatomic distances between

6 Arg138 and the PMP-pyruvate quinonoid intermediate during the molecular dynamics

7 simulation. The distance between N $\eta$  atom of Arg138 of chain B and the carboxyl oxygen

8 atom of the quinonoid in the active site of chain A is shown in blue, while the other pair of

9 Arg138 and the quinonoid is shown in red. (c) A snapshot of the interaction between

10 Arg138 and PMP-pyruvate quinonoid intermediate at 6.5 ns.

1

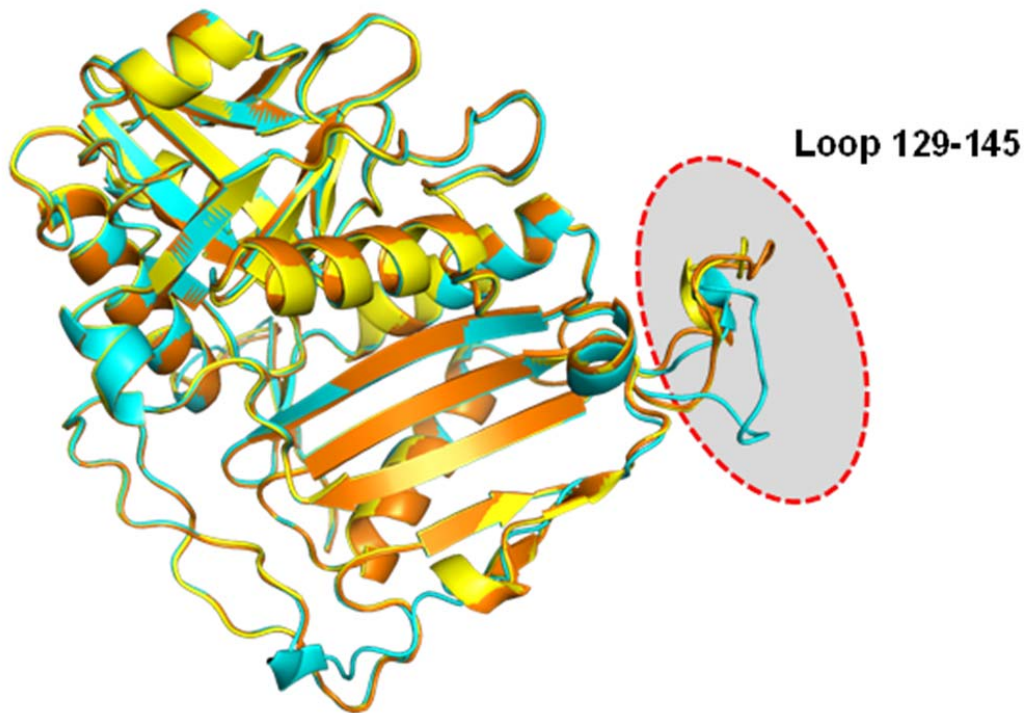

2

3 **Supplementary Figure 7. Overall structure alignment of Ab-R-ATA, the G136F**  
4 **mutant and ATA-117-Rd11.** The protomers of Ab-R-ATA, the G136F mutant and  
5 ATA-117-Rd11 are shown in a cartoon representation in cyan, orange and yellow,  
6 respectively. The three crystal structures are almost the same except for the loop 129-145,  
7 which is surrounded by a red dashed oval.

8



1

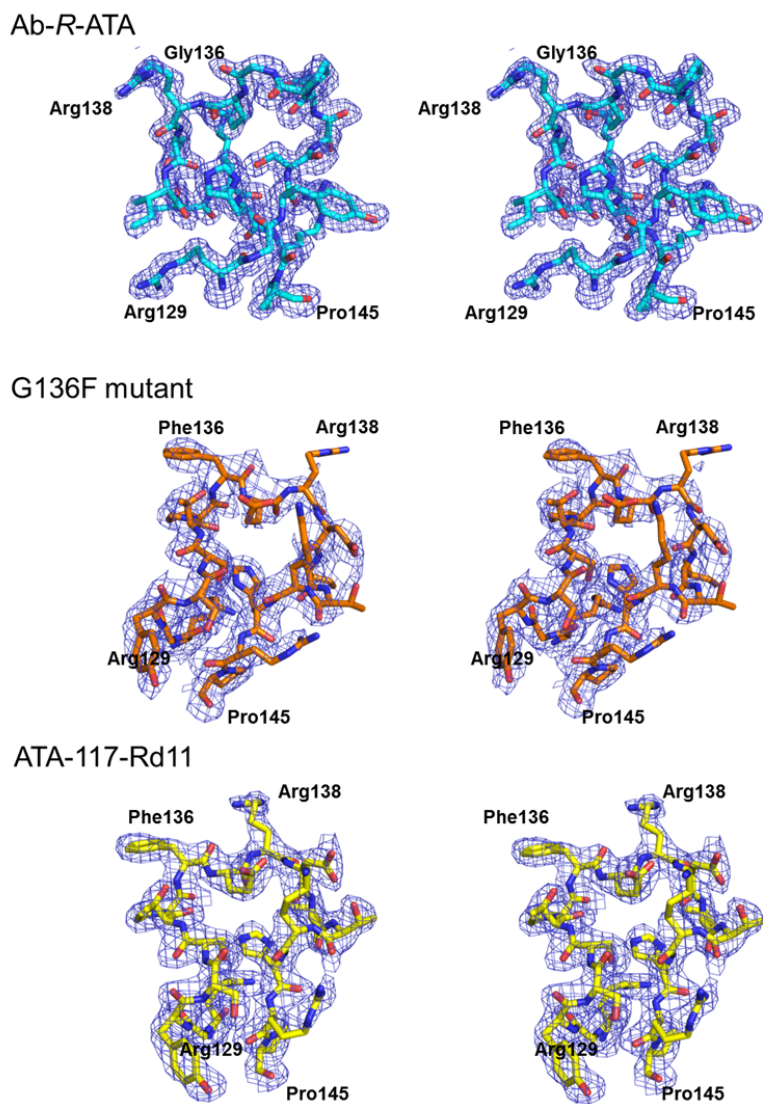

2

3 **Supplementary Figure 8.  $F_o-F_c$  omit map for the loop 129-145 for Ab-R-ATA, the**  
4 **G136F mutant and ATA-117-Rd11.** The maps are shown as light blue mesh contoured at  
5 2.5  $\sigma$ .



1 in red on a white background. At the top of the sequences, schematic representations of the  
2 secondary structure elements of Ab-*R*-ATA are shown. The  $\alpha$  helix is depicted by a coil and  
3 the  $\beta$  strand is depicted by an arrow. Alignment was generated by ClustalW and the figure  
4 was generated by ESPript. The residues in the small binding pocket and large binding  
5 pocket of Ab-*R*-ATA and ATA-117-Rd11 are labeled with cyan characters and orange  
6 characters, respectively. The loops 129-145 are highlighted in a green box. Arg126 of the  
7 *R*-ATA from *Aspergillus fumigatus* and Arg128 of the *R*-ATA from *Aspergillus terreus* are  
8 indicated by filled black triangle. Arg138 of Ab-*R*-ATA is indicated by open black triangle.  
9 The homologs of Ab-*R*-ATA are from *Aspergillus terreus* (GI\_115385557), *Penicillium*  
10 *chrysogenum* (GI\_211591081), *Aspergillus oryzae* (GI\_169768191), *Aspergillus fumigatus*  
11 (GI\_70986662), *Neosartorya fischeri* (GI\_119483224), *Gibberella zeae* (GI\_46109768),  
12 *Mycobacterium vanbaalenii* (GI\_120405468) and *Nectria haematococca* (GI\_597960025).  
13

1

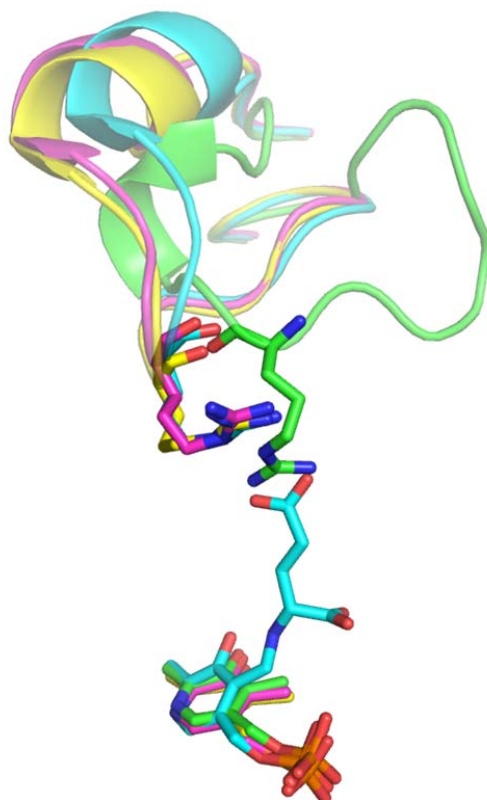

2

3 **Supplementary Figure 10. The comparison of the Arg residues pointed into the active**  
4 **site.** Arg138 of Ab-*R*-ATA, Arg128 of *R*-ATA from *Aspergillus terreus* (PDB ID 4CE5),  
5 Arg126 of *R*-ATA from *Aspergillus fumigatus* (PDB ID 4CHI) and Arg126 of *R*-ATA from  
6 *Nectria haematococca* (PDB ID 4CMD) are shown in green, cyan, magenta, and yellow  
7 sticks, respectively. The external aldimine and PLP moieties of internal aldimine are also  
8 shown in the same representation.

1 **Supplementary Table 1.** Data collection and refinement statistics

|                                                         | <b>Ab-R-ATA</b>                        | <b>ATA-117-Rd11</b>     | <b>Ab-R-ATA G136F</b>   |
|---------------------------------------------------------|----------------------------------------|-------------------------|-------------------------|
| <b>Data collection</b>                                  |                                        |                         |                         |
| Beamline                                                | PF BL5A                                | PF AR-NW12A             | PF BL5A                 |
| Wavelength (Å)                                          | 1.0000                                 | 1.0428                  | 1.0000                  |
| Space group                                             | <i>P</i> 4 <sub>2</sub> 2 <sub>1</sub> | <i>P</i> 2 <sub>1</sub> | <i>P</i> 2 <sub>1</sub> |
| Cell dimensions (Å)                                     | 80.62, 80.62, 93.88                    | 82.01, 133.54, 195.54   | 81.96, 134.28, 196.04   |
| Cell angles (Å)                                         | 90.00, 90.00, 90.00                    | 90.00, 100.41, 90.00    | 90.00, 100.35, 90.00    |
| Resolution (Å)                                          | 45.0-1.65                              | 20.0-2.20               | 50.0-2.27               |
| Number of observations                                  | 485000                                 | 719999                  | 725546                  |
| Number of unique reflections                            | 37724                                  | 201959                  | 190856                  |
| Completeness (%)                                        | 99.9 (98.4)                            | 96.3 (90.2)             | 98.8 (92.2)             |
| <i>R</i> <sub>merge</sub> (%)                           | 6.1 (70.1)                             | 6.2 (28.6)              | 8.5 (65.5)              |
| Redundancy                                              | 12.86                                  | 3.57                    | 3.80                    |
| <i>I</i> /σ ( <i>I</i> )                                | 31.93 (2.53)                           | 13.99 (3.83)            | 11.6(1.99)              |
| <b>Refinement</b>                                       |                                        |                         |                         |
| Resolution range (Å)                                    | 40.3-1.65                              | 20.0-2.20               | 40.0-2.27               |
| <i>R</i> <sub>work</sub> / <i>R</i> <sub>free</sub> (%) | 15.4/17.2                              | 16.8/21.3               | 17.1/21.8               |
| Number of non-hydrogen atoms                            |                                        |                         |                         |
| Protein                                                 | 2566                                   | 30165                   | 30292                   |
| Water                                                   | 324                                    | 1802                    | 1856                    |
| Ligand                                                  | PLP, glycerol                          | PLP                     | PLP                     |
|                                                         | 21                                     | 192                     | 180                     |
| RMSD bond length (Å)                                    | 0.007                                  | 0.009                   | 0.012                   |
| RMSD bond angle (°)                                     | 1.209                                  | 1.252                   | 1.455                   |
| Ramachandran plot (%)                                   |                                        |                         |                         |
| Preferred                                               | 97.6                                   | 97.1                    | 97.8                    |
| Allowed                                                 | 2.4                                    | 2.8                     | 2.1                     |
| Outliers                                                | 0.0                                    | 0.1                     | 0.1                     |

2

3 The values in parentheses are for the highest resolution shell.

4  $R_{\text{work}} = \frac{\sum_{hkl} ||F_o| - |F_c||}{\sum |F_o|}$ , where *F*<sub>o</sub> is the observed structure factor and *F*<sub>c</sub> is the calculated structure factor. *R*<sub>free</sub> was calculated with 5% of

5 reflections omitted from the refinement.

1 **Supplementary Table 2.** Kinetic parameters of Ab-*R*-ATA and its mutants

|       | Specific activity<br>for pyruvate <sup>(b)</sup><br>U <sup>(a)</sup> /mg | Specific activity<br>for benzylacetone <sup>(b)</sup><br>U <sup>(a)</sup> /mg | $K_m$ for<br>pyruvate <sup>(b)</sup><br>(mM) | $k_{cat}$ for<br>pyruvate <sup>(b)</sup><br>(s <sup>-1</sup> ) | $k_{cat}/K_m$ <sup>(b)</sup><br>(s <sup>-1</sup> mM <sup>-1</sup> ) |
|-------|--------------------------------------------------------------------------|-------------------------------------------------------------------------------|----------------------------------------------|----------------------------------------------------------------|---------------------------------------------------------------------|
| WT    | 11.3±0.2                                                                 | 0.33±0.01                                                                     | 5.8±0.1                                      | 14±0                                                           | (240±10)×10 <sup>-2</sup>                                           |
| R138Q | 0.85±0.09                                                                | 0.08±0.00                                                                     | 66±3                                         | 3.4±0.1                                                        | (5.2±0.1)×10 <sup>-2</sup>                                          |
| R138A | 0.86±0.02                                                                | 0.16±0.00                                                                     | 110±20                                       | 9.2±1.1                                                        | (8.1±0.3)×10 <sup>-2</sup>                                          |
| G136Y | 0.47±0.01                                                                | 0.38±0.01                                                                     | 350±20                                       | 12±0                                                           | (3.3±0.1)×10 <sup>-2</sup>                                          |
| G136F | 0.21±0.01                                                                | 0.94±0.11                                                                     | 1300±100                                     | 15±1                                                           | (1.2±0.0)×10 <sup>-2</sup>                                          |
| G136H | 1.11±0.01                                                                | 0.40±0.01                                                                     | 120±10                                       | 11±0                                                           | (8.8±0.4)×10 <sup>-2</sup>                                          |
| G136W | 0.65±0.04                                                                | 0.18±0.01                                                                     | 580±90                                       | 23±2                                                           | (4.1±0.3)×10 <sup>-2</sup>                                          |

2

3 (a) One unit of Ab-*R*-ATA and mutants was defined as the amount of enzyme producing 1 μmol of D-alanine or (*R*)-amine per minute.

4 (b) The values are given as mean ± SEM of three independent experiments.
